# Supplementary material
Source: PubMed Central journal article supplement (PMC2843139)
Supplement: NIHMS175841-supplement-Aldinger_et_al_supplement.pdf [file NIHMS175841-supplement-Aldinger_et_al_supplement.pdf]

## ***FOXC1* is required for normal cerebellar development and is a major contributor to chromosome 6p25.3 Dandy-Walker malformation**

Kimberly A. Aldinger<sup>1</sup>, Ordan J. Lehmann<sup>4</sup>, Louanne Hudgins<sup>5</sup>, Victor V. Chizhikov<sup>2</sup>, Alexander G. Bassuk<sup>6</sup>, Lesley C. Ades<sup>7</sup>, Ian D. Krantz<sup>8</sup>, William B. Dobyns<sup>2,3</sup>, and Kathleen J. Millen<sup>1-3</sup>

<sup>1</sup>Committee on Neurobiology, <sup>2</sup>Departments of Human Genetics and <sup>3</sup>Neurology, The University of Chicago, Chicago, Illinois, USA; <sup>4</sup>Departments of Ophthalmology and Medical Genetics, University of Alberta, Edmonton, Canada; <sup>5</sup>Division of Medical Genetics, Department of Pediatrics, Stanford University, Stanford, California, USA <sup>6</sup>Department of Pediatrics, Division of Neurology and the Interdisciplinary Graduate Program in Genetics, University of Iowa, Iowa City, Iowa, USA; <sup>7</sup>Department of Clinical Genetics, The Children's Hospital at Westmead and Discipline of Paediatrics and Child Health, University of Sydney, New South Wales, Australia; <sup>8</sup>Division of Human Genetics, The Children's Hospital of Philadelphia, Philadelphia, Pennsylvania, USA

### **Supplementary Note regarding the main text**

#### *Penetrance, expressivity and modifying factors*

Among our patient cohort the brain phenotypes are highly penetrant but exhibit variable expressivity, recapitulating perfectly the ocular phenotypes attributable to *FOXC1*-associated disease<sup>1</sup>. The sole example of apparent non-penetrance is the patient with ring chromosome 6, who has a more extensive genomic alteration deleting part of 6q27<sup>2</sup> and limiting comparisons with other subjects (n = 20). Interestingly, this individual, despite having normal vermis size, does exhibit some posterior fossa pathology comprising a meningeal defect with gyral herniation through the tentorial notch (**arrow in Fig. 2h**). Our results resemble *PAX6*-associated eye and brain phenotypes, which are also highly penetrant and exhibit variable expressivity<sup>3,4</sup>.

Our data also shows a similar brain phenotype in patients with deletions and duplications encompassing *FOXC1*, again recapitulating the ocular phenotypes. The mechanisms by which increased or decreased *FOXC1* dosage cause comparable phenotypes are unknown. However, the effects of *FOXC1* are mediated through many downstream genes including both heat shock

proteins and *FOXO1A*, a key cell cycle regulator<sup>5</sup>. *FOXO1A* influences cellular homeostasis when positively or negatively regulated<sup>6</sup>, providing one possible explanation for how seemingly similar human disorders could arise from both increases and decreases in *FOXC1* gene dose.

#### *Malformation of cortical development*

Analysis of the cerebral cortex in the mouse *Foxc1*<sup>hith/hith</sup> hypomorph showed defects in the basement membrane allowing inappropriate migration of neurons into the subarachnoid space and onto the surface of the brain<sup>7</sup>. This was reported to resemble the cobblestone cortical malformation seen in dystroglycanopathies in both mouse and humans, which include Fukuyama congenital muscular dystrophy, muscle-eye-brain disease, and Walker-Warburg syndrome<sup>8-17</sup>. A cobblestone-like cortical malformation has been demonstrated in mice<sup>18</sup> and in humans with homozygous mutations of *GPR56* (**Supplementary Figure 6b**). None of the brain-imaging studies in our 6p25.3 CNV or *FOXC1* mutation patients demonstrated a cortical malformation (**Supplementary Figure 6c-h**). Thus, mutation of *FOXC1* in humans does not cause a visible cortical malformation and is not in any way comparable to the severe cortical malformation found in patients with mutations of *GPR56* or with any of the dystroglycanopathies.

#### *Malformations of meningeal development*

Because our analysis of *Foxc1* expression implicated cranial mesenchyme, we specifically examined brain-imaging studies from our 6p25.3-*FOXC1* subjects for defects in the meninges, which are derived from cranial mesenchyme and neural crest. We found two distinct types of meningeal defects consisting of (1) interdigitation of right-left gyri across the midline as shown in **Supplementary Figure 6c-d** and (2) herniation of mesial posterior gyri through an enlarged tentorial notch into the posterior fossa as seen in **Figure 2d-h-j**. Overall, we observed one or both types of meningeal defects in 6/17 patients in this study. We also found enlarged posterior fossa size in 12/21 patients.

Intracranial malformations related to defective development of the meninges have not been widely recognized, but have been reported. In our much larger (n = 5,300 as of early 2009) cohort of patients with brain malformations and related developmental disorders, we have observed similar meningeal abnormalities. For example, we have observed interdigitation of right-left gyri across the midline in several patients with total or severe partial agenesis of the corpus callosum (ACC), most often in the mesial frontal region just anterior to the genu of the corpus callosum. This implies deficiency of the falx cerebri in this region. We have observed

herniation of mesial posterior gyri into the posterior fossa in several patients with cerebellar hypoplasia who do not have deletion 6p25.3. This malformation has been reported in patients with enlarged parietal foramina or “Catlin marks” including several with mutations of *ALX4*, which is expressed in cranial mesenchyme and the developing skull<sup>19-22</sup>.

These data lead us to hypothesize that developmental disorders of the mesenchyme may contribute to other forms of MCM and DWM, as well as to other brain malformations beyond MCM and DWM. We recommend that the presence or absence of these meningeal defects become part of the standard evaluation of brain imaging studies, certainly among individuals with developmental disorders.

#### *White matter abnormalities*

Several of our 6p25.3 CNV and *FOXC1* mutation patients had patchy white matter signal abnormalities typical of prominent perivascular or Virchow-Robin spaces (**Supplementary Figure 6e-h**). We did not find any evidence for recent or old strokes.

## Supplementary Figures

### Supplementary Figure 1

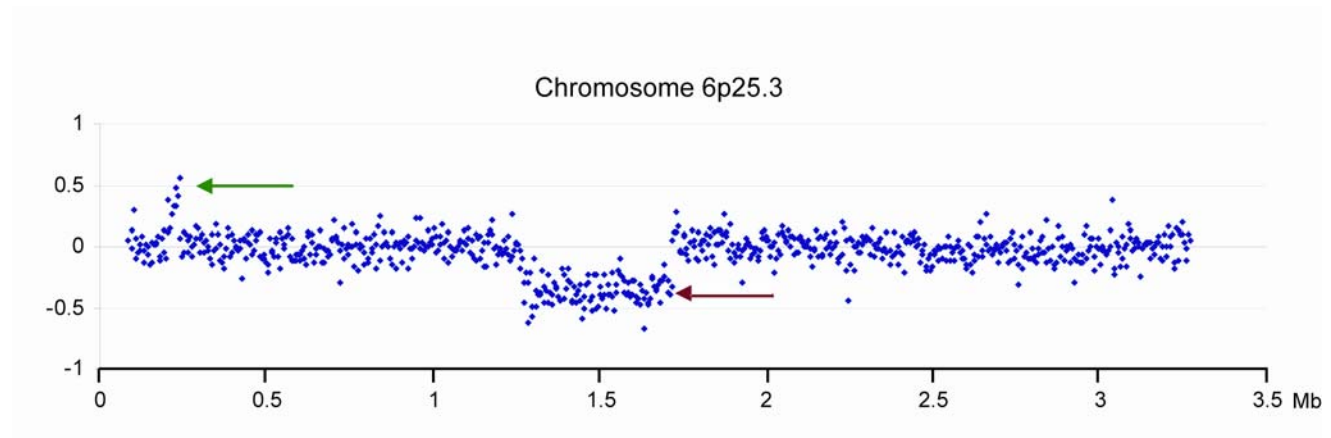

**Supplementary Figure 1.** Telomeric chromosome 6p aCGH results for patient LR08-198 show the presence of a recognized CNV polymorphism (green arrow) and an abnormal segmental deletion (red arrow). Chromosome position (NCBI Build 35) is shown along the X-axis, log<sub>2</sub> Cy3:Cy5 ratio is shown along the Y-axis.

## Supplementary Figure 2

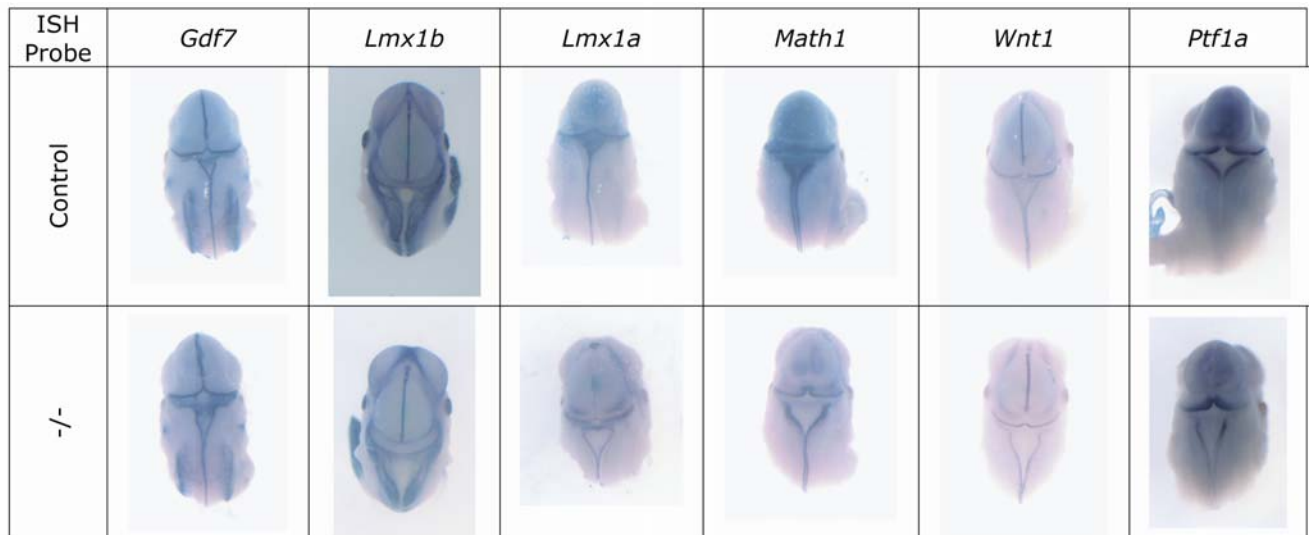

**Supplementary Figure 2.** Dorsal views of heads showing the expression of six genes important for early roof plate induction, rhombic lip specification and cerebellar anlage patterning in e12.5 WT and *Foxc1*<sup>-/-</sup> littermate embryos, as assayed by ISH. Markers are indicated. Normal expression for all six genes is observed in the hindbrain of mutant embryos.

### Supplementary Figure 3

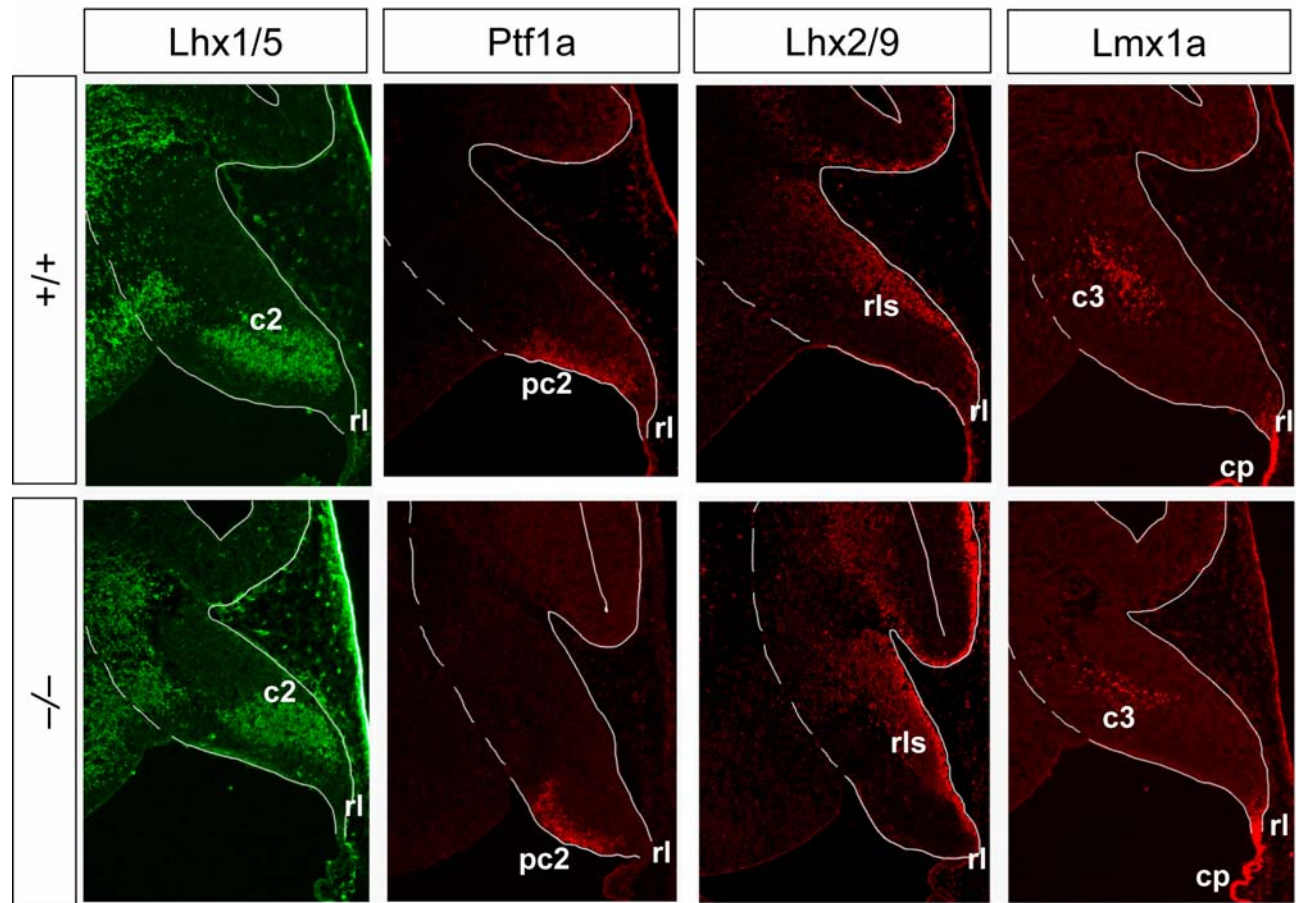

**Supplementary Figure 3.** Cellular populations within the e12.5 cerebellar anlage. Paramedial sagittal immunostained sections through dorsal rhombomere 1 in WT and *Foxc1*<sup>-/-</sup> littermate embryos. Markers are indicated. All cellular populations are present in the expected domains of the cerebellar anlage in the mutant embryos. c2 and c4 cells are Lhx1/5<sup>+</sup>. Ptf1a<sup>+</sup> pc2 cells are progenitors of the Lhx1/5<sup>+</sup> c2 cells. Lhx2/9<sup>+</sup> cells are the first cells to leave the rhombic lip (rl) and migrate through the rostral migratory stream (rls). Lmx1a marks the rl, choroid plexus and c3 cells that are of unknown fate.

### Supplementary Figure 4

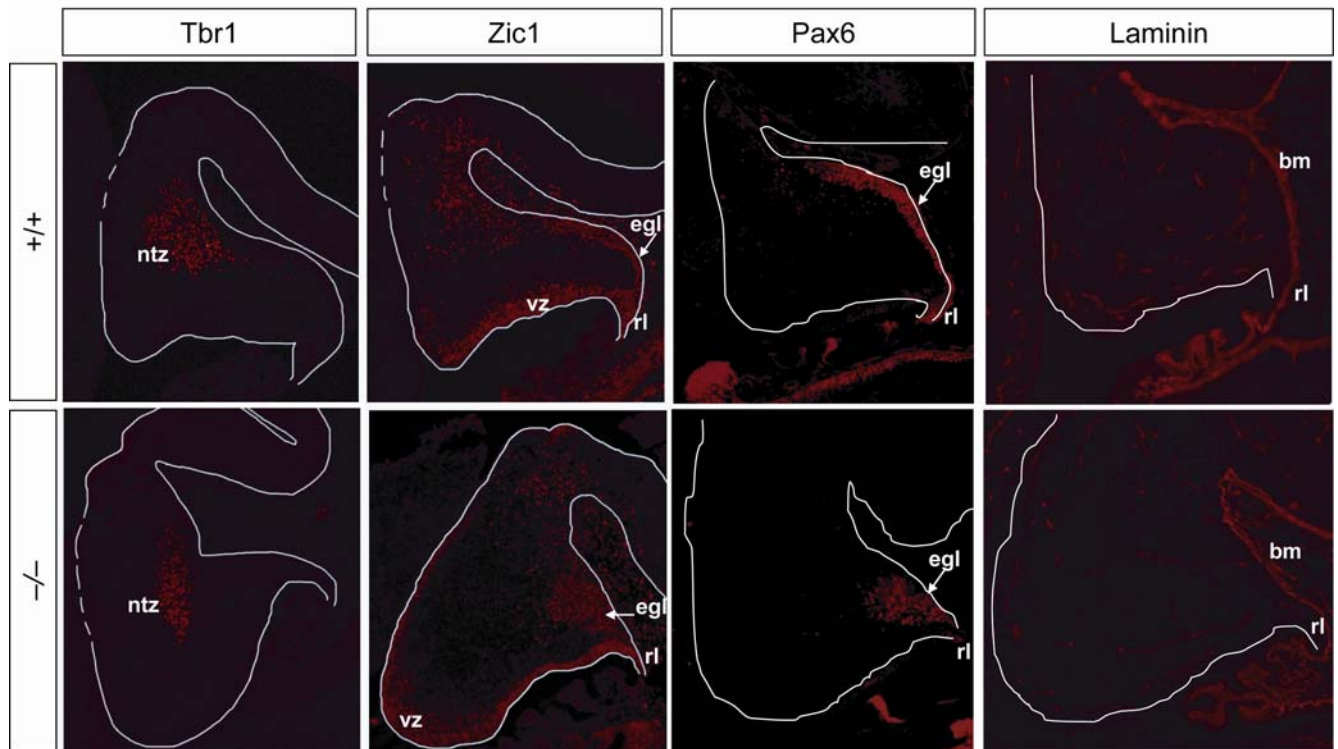

**Supplementary Figure 4.** Cellular populations within the e14.5 cerebellar anlage. Paramedial sagittal immunostained sections through dorsal rhombomere 1 in WT and *Foxc1*<sup>-/-</sup> littermate embryos. Markers are indicated. All cellular populations are present in the expected domains of the cerebellar anlage in the mutant embryos. *Tbr1*<sup>+</sup> expression in rhombic lip (lp) derived cells within the nuclear transitory zone (ntz) is present in *Foxc1*<sup>-/-</sup> embryos. *Zic1* and *Pax6* label cells within the external granule cell layer (egl). *Zic1*<sup>+</sup> cells also occupy the ventricular zone (vz) in WT and *Foxc1*<sup>-/-</sup> embryos. *Pax6* marks *Math1*-derived cells from the rl, including cells in the egl. Despite the abnormal clump of cells in the egl of *Foxc1*<sup>-/-</sup> embryos, *Zic1/Pax6*<sup>+</sup> expression demonstrates that these cells maintain egl progenitor identity. No discontinuity in laminin expression within the basement membrane (bm) at the pial surface of the cerebellum is observed in *Foxc1*<sup>-/-</sup> embryos.

**Supplementary Figure 5**

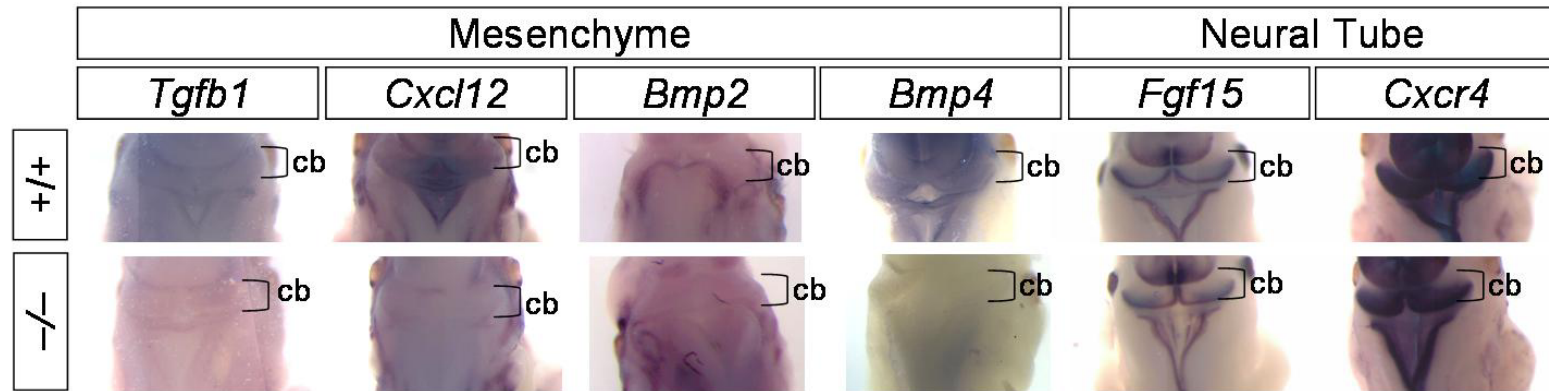

**Supplementary Figure 5.** Expression of four signaling molecules secreted from mesenchyme and two molecules expressed in hindbrain neural tube in e12.5 WT and *Foxc1*<sup>-/-</sup> littermate embryos, as assayed by ISH. Dorsal views of heads show all four genes secreted from mesenchyme are down-regulated in the hindbrain of mutant embryos, while the expression of the two genes expressed in the hindbrain neural tube are normal.



## Supplementary Figure 6

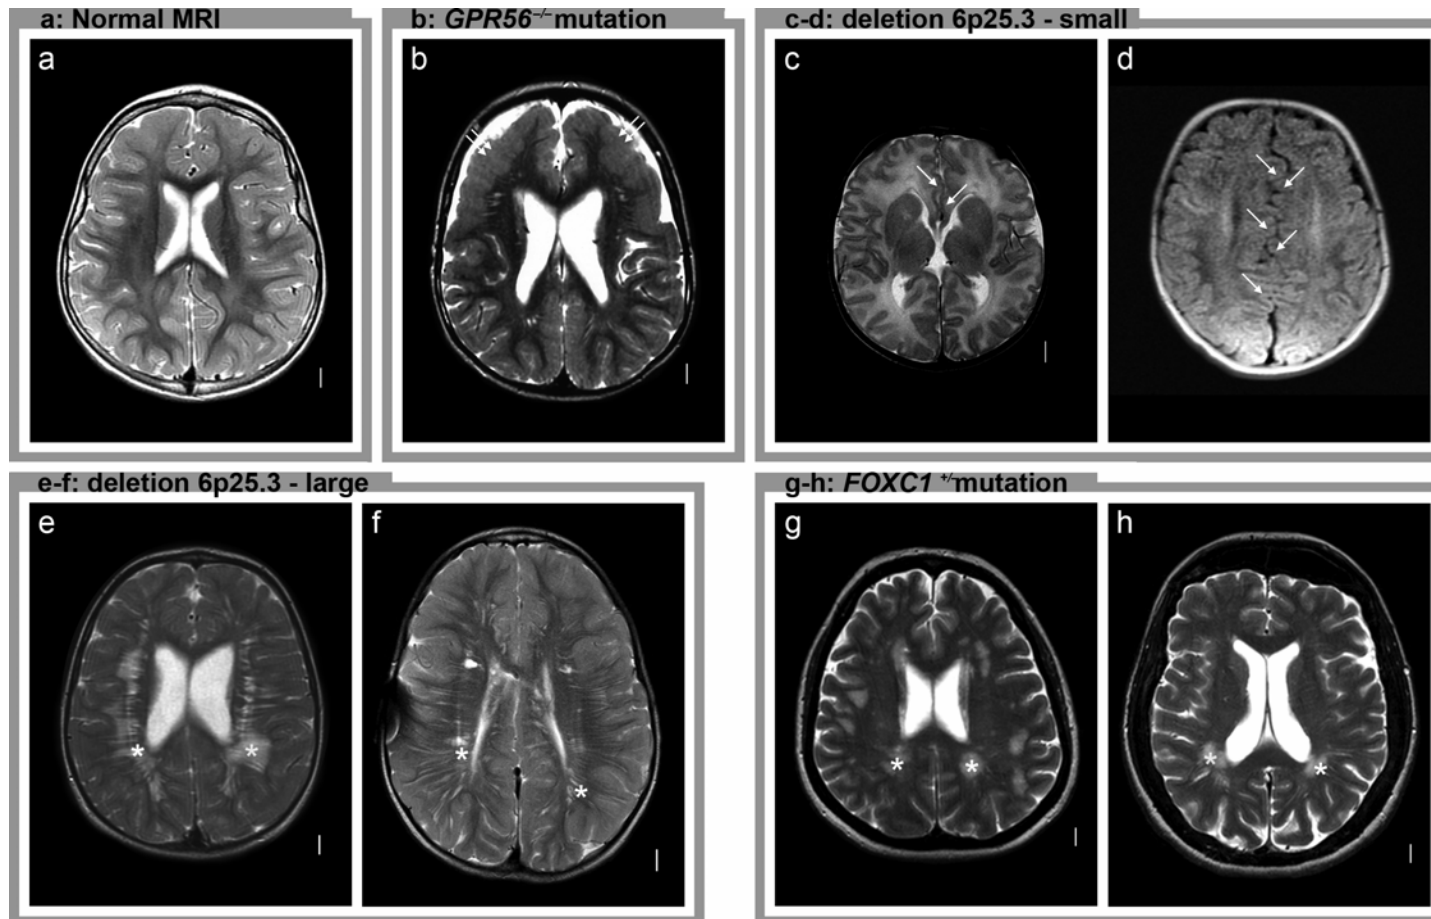

**Supplementary Figure 6.** T2-weighted (T1- in d) axial magnetic resonance images in a control subject (a), one patient with cobblestone-like cortical malformation associated with homozygous mutation of *GPR56*<sup>23,24</sup> (b), four patients with deletion 6p25.3 (c-f), and two with *FOXC1* mutations (g-h). The scan from the *GPR56*<sup>-/-</sup> patient shows a thick dysplastic (cobblestone-like) cortical malformation over the frontal lobe that is not seen in any patient with a copy number variant or mutation of *FOXC1*, even though the

*Gpr56*<sup>-/-</sup> and *Foxc1*<sup>-/-</sup> mouse mutants have similar cortical abnormalities. The *GPR56*<sup>-/-</sup> scan also shows a few areas of abnormal white matter signal. The first two scans from patients with small 6p25.3 deletions show mild (c) or marked (d) abnormal interdigitation of right- and left-sided gyri (arrows) indicating deficiency of the falx. The four scans in the bottom row from patients with deletion 6p25.3 (e-f) or *FOXC1* mutations (g-h) demonstrate white matter changes consistent with prominent perivascular spaces (asterisks in e-h), but we did not find any strokes. These images come from patients LR06-130 (a), LR02-097 (b), LR08-198 (c), LR07-072 (d), LR04-302 (e), LR04-313a2 (f), LR08-027a1 (g) and LR08-075 (h) as listed in **Figure 1**.

## Supplementary Figure 7

a

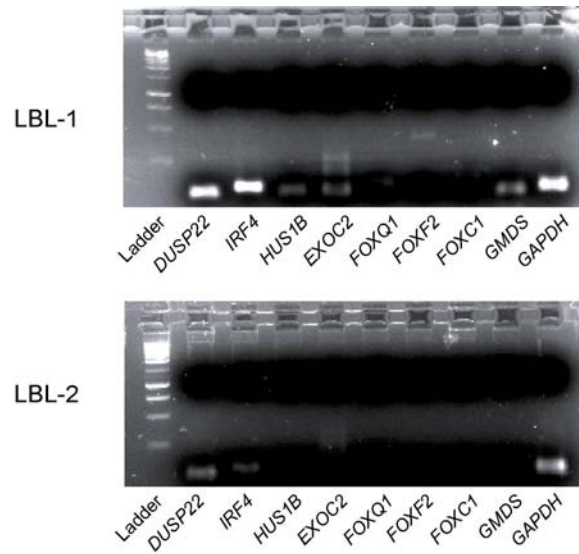

b

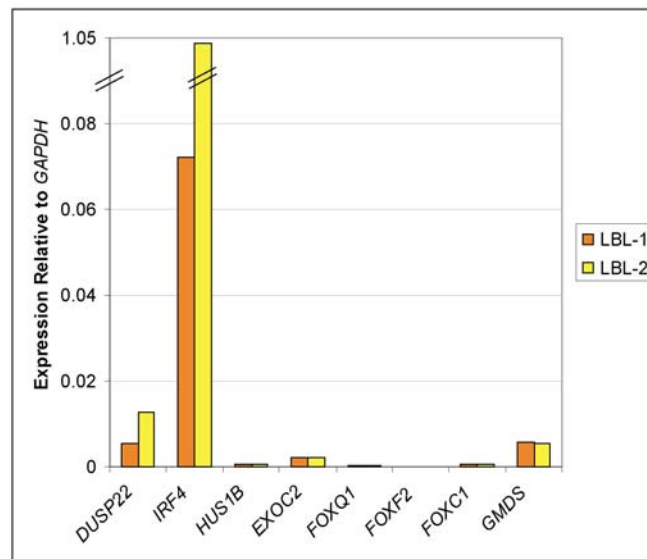

**Supplementary Figure 7.** Expression of the 6p25.3 DWM locus genes in control lymphoblastoid cell lines (LBLs). (a) Target amplification of 8 genes and *GAPDH* shows that most genes are expressed either at very low or undetectable levels (*FOX* genes) in LBLs from two individuals. (b) qRT-PCR confirms that *IRF4* is the only gene that shows detectable, but variable LBL expression. These results are consistent with publicly available human GeneAtlas (Affymetrix U133A) expression array data (<http://biogps.gnf.org/>).

## Supplementary Tables

**Supplementary Table 1. Classical DWM loci identified by cytogenetics.**

| Locus           | N  | Mb  |
|-----------------|----|-----|
| del 3q24-q25.1  | 09 | 1.9 |
| del 6p25.3      | 19 | 1.8 |
| del 13q31.2-q33 | 07 | 23  |
| dup 9pter-p11.2 | 15 | 47  |

A comprehensive review of the clinical cytogenetic literature revealed four loci for DWM throughout the genome, each with reports of multiple patients<sup>23-25</sup>. Among patients with DWM and cytogenetic abnormalities encompassing one of the four DWM loci, del 6p25.3 is the most frequent (38%). Among del 6p25.3 patients with MRI or CT images available, we confirmed 33% (19/58) have DWM. del, deletion; dup, duplication; pter, short arm terminus or telomere; N, number of patients; Mb, size of locus in megabases.

**Supplementary Table 2. Known gene content of the 6p25.3 DWM critical region.**

| Known Genes                                          | Mouse developmental expression                                         | Mouse model available                                                   | Reported $-/-$ phenotype            | $-/-$ Cerebellar phenotype assessment |
|------------------------------------------------------|------------------------------------------------------------------------|-------------------------------------------------------------------------|-------------------------------------|---------------------------------------|
| <i>Dusp22</i><br>dual specificity phosphatase 22     | Caudal somites<br>No cerebellum                                        | No                                                                      | N/A                                 | N/A                                   |
| <i>Irf4</i><br>interferon regulatory factor 4        | Ubiquitous low level expression throughout embryo including cerebellum | KO <sup>26</sup>                                                        | Deficient immune response           | Normal                                |
| <i>Exoc2</i><br>Sec5 exocyst homologue               | Ubiquitous throughout embryo, including cerebellum                     | No                                                                      | N/A                                 | N/A                                   |
| <i>Hus1b</i><br>Hus1 checkpoint homologue            | Ubiquitous throughout embryo, including cerebellum                     | KO<br>(H. Hang unpublished)                                             | N/A                                 | Normal                                |
| <i>Foxq1</i><br>Forkhead box transcription factor q1 | Endothelial throughout embryo                                          | <i>Satin</i> spontaneous mutant <sup>27</sup>                           | Coat texture                        | Normal                                |
| <i>Foxf2</i><br>Forkhead box transcription factor f2 | Oral cavity and urogenital system                                      | KO <sup>28</sup>                                                        | Cleft palate                        | Normal                                |
| <i>Foxc1</i><br>forkhead box transcription factor c1 | Head mesenchyme including adjacent to hindbrain                        | <i>congenital hydrocephalus</i> spontaneous mutant and KO <sup>29</sup> | Eye, lung, urogenital, skull, heart | Abnormal at e12.5                     |
| <i>Gmcs</i><br>GDP-mannose 4, 6-dehydratase          | Gastrointestinal<br>No cerebellum                                      | No                                                                      | N/A                                 | N/A                                   |

**Supplementary Table 3. Mouse and Human Primer Sequences**

| Species | Gene                          | RefSeq       | Forward Primer       | Reverse Primer           | cDNA | gDNA   |
|---------|-------------------------------|--------------|----------------------|--------------------------|------|--------|
| Mouse   | <i>Bmp2</i>                   | NM_007553    | GAAGTTCCTCCACGGCTTCT | AGATCTGTACCGCAGGCACT     | 123  | 6230   |
| Mouse   | <i>Bmp4</i>                   | NM_007554    | ATCAAAGTAGCATGGCTCGC | TGGACTGTTATTATGCCTTGTTTT | 115  | 1178   |
| Mouse   | <i>Cxcl12</i>                 | NM_021704    | TTTCAGATGCTTGACGTTGG | GCGCTCTGCATCAGTGAC       | 102  | 2867   |
| Mouse   | <i>Cxcr4</i>                  | NM_009911    | TCCAGACCCCACTTCTTCAG | AGTGACCCTCTGAGGCGTTT     | 124  | 2395   |
| Mouse   | <i>Fgf15</i>                  | NM_008003    | CAGTCCATTTCTCCCTGAA  | TGAAGACGATTGCCATCAAG     | 124  | 2553   |
| Mouse   | <i>Foxc1</i>                  | NM_008592    | CGGCACTCTTAGAGCCAAAT | TTTGAGCTGATGCTGGTGAG     | 167  | 167    |
| Mouse   | <i>Gmcs</i>                   | AK086078     | GGAGCAGCCAAACTCTATGC | AAACCAGCCACAAACCTGAC     | 998  | 27512  |
| Mouse   | <i>Gapdh</i>                  | NM_001001303 | TTGATGGCAACAATCTCCAC | CGTCCCCTAGACAAAATGGT     | 110  | 1944   |
| Mouse   | <i>Tgfb1</i>                  | NM_011577    | AAGTTGGCATGGTAGCCCTT | GCCCTGGATACCAACTATTGC    | 128  | 6980   |
| Mouse   | <i>Ttr</i>                    | NM_013697    | GGTGCTGTAGGAGTATGGGC | GGAAGACACTTGGCATTTC      | 119  | 3635   |
| Human   | <i>DUSP22</i>                 | NM_020185    | GCTGGGATGCACAGGTATTT | GCGGAACAATTGAGCAAGA      | 98   | 23249  |
| Human   | <i>EXOC2</i>                  | NM_018303    | TTTGTGGAGCAAAGTGGTGA | AGTCTTCGGCGAGACCTACC     | 103  | 55260  |
| Human   | <i>FOXC1</i>                  | NM_001453    | ACATGTTGTAGGAGTCCGGG | CCTTCTACCGGGACAACAAG     | 147  | 147    |
| Human   | <i>FOXF2</i>                  | NM_001452    | TCCCATTGAAGTTGAGGACG | ACTCGCTGGAGCAGAGCTAC     | 126  | 3703   |
| Human   | <i>FOXQ1</i>                  | NM_033260    | GGATCTTCGCCTTTTCTCC  | CCCATAGTCCACCCAACACT     | 121  | 121    |
| Human   | <i>GAPDH</i>                  | NM_002046    | AATGAAGGGGTCATTGATGG | AAGGTGAAGGTCGGAGTCAA     | 188  | 1740   |
| Human   | <i>GMDS</i>                   | NM_001500    | ATAACGAAGTCCTCCGGCTC | AAATCTGGATGCCAAACGAG     | 130  | 187646 |
| Human   | <i>HUS1B</i>                  | NM_148659    | AGGGCCGTCGTAGGATGTAT | GCCTGAAAACAGAGACCTGG     | 102  | 102    |
| Human   | <i>IRF4</i>                   | NM_002460    | GGGTCTGGAAACTCCTCTCC | CCTGCAAGCTCTTTGACACA     | 118  | 3358   |
| Mouse   | * <i>Foxc1<sup>hith</sup></i> |              | CGGCGAGCAGAGCTACTATC | CCTTCACTGCGTCCTTCTTC     |      | 484    |

Amplicon sizes for both complimentary DNA (cDNA) and genomic DNA (gDNA) are listed in basepairs for all RT-PCR primer pairs.

\*Primers used to genotype *Foxc1<sup>hith</sup>* mice.

## Supplementary References

1. Alward, W.L. Axenfeld-Rieger syndrome in the age of molecular genetics. *Am J Ophthalmol* **130**, 107-15 (2000).
2. Chanda, B. et al. A novel mechanistic spectrum underlies glaucoma-associated chromosome 6p25 copy number variation. *Hum Mol Genet* **17**, 3446-58 (2008).
3. Hanson, I.M. et al. Mutations at the PAX6 locus are found in heterogeneous anterior segment malformations including Peters' anomaly. *Nat Genet* **6**, 168-73 (1994).
4. Sisodiya, S.M. et al. PAX6 haploinsufficiency causes cerebral malformation and olfactory dysfunction in humans. *Nat Genet* **28**, 214-6 (2001).
5. Berry, F.B. et al. FOXC1 is required for cell viability and resistance to oxidative stress in the eye through the transcriptional regulation of FOXO1A. *Hum Mol Genet* **17**, 490-505 (2008).
6. Burgering, B.M. & Kops, G.J. Cell cycle and death control: long live Forkheads. *Trends Biochem Sci* **27**, 352-60 (2002).
7. Zarbalis, K. et al. Cortical dysplasia and skull defects in mice with a Foxc1 allele reveal the role of meningeal differentiation in regulating cortical development. *Proc Natl Acad Sci U S A* **104**, 14002-7 (2007).
8. Miller, G., Ladda, R.L. & Towfighi, J. Cerebro-ocular dysplasia-muscular dystrophy (Walker-Warburg) syndrome: findings in a 20-week-old fetus. *Acta Neuropathol* **82**, 234-238 (1991).
9. Michele, D.E. & Campbell, K.P. Dystrophin-glycoprotein complex: post-translational processing and dystroglycan function. *J Biol Chem* **278**, 15457-60 (2003).
10. Moore, S.A. et al. Deletion of brain dystroglycan recapitulates aspects of congenital muscular dystrophy. *Nature* **418**, 422-5 (2002).
11. Dobyns, W.B. et al. Diagnostic criteria for Walker-Warburg syndrome. *Am J Med Genet* **32**, 195-210. (1989).
12. Dobyns, W.B., Kirkpatrick, J.B., Hittner, H.M., Roberts, R.M. & Kretzer, F.L. Syndromes with lissencephaly. II: Walker-Warburg and cerebro-oculo-muscular syndromes and a new syndrome with type II lissencephaly. *Am J Med Genet* **22**, 157-195 (1985).
13. Williams, R.S., Swisher, C.N., Jennings, M., Ambler, M. & Caviness V.S., J. Cerebro-ocular dysgenesis (Walker-Warburg syndrome): neuropathologic and etiologic analysis. *Neurology* **34**, 1531-1541 (1984).
14. Haltia, M. et al. Muscle-eye-brain disease: a neuropathological study. *Ann Neurol* **41**, 173-180 (1997).
15. Takeda, S. et al. Fukutin is required for maintenance of muscle integrity, cortical histogenesis and normal eye development. *Hum Mol Genet* **12**, 1449-59 (2003).
16. Jin, Z. et al. Disease-associated mutations affect GPR56 protein trafficking and cell surface expression. *Hum Mol Genet* **16**, 1972-85 (2007).
17. Piao, X. et al. Genotype-phenotype analysis of human frontoparietal polymicrogyria syndromes. *Ann Neurol* **58**, 680-7 (2005).
18. Li, S. et al. GPR56 regulates pial basement membrane integrity and cortical lamination. *J Neurosci* **28**, 5817-26 (2008).
19. Mavrogiannis, L.A. et al. Haploinsufficiency of the human homeobox gene ALX4 causes skull ossification defects. *Nat Genet* **27**, 17-8 (2001).
20. Reddy, A.T., Hedlund, G.L. & Percy, A.K. Enlarged parietal foramina: association with cerebral venous and cortical anomalies. *Neurology* **54**, 1175-8 (2000).
21. Valente, K.D. & Valente, M. Epilepsy in one family with parietal foramina: an incidental finding? *J Neurol Neurosurg Psychiatry* **75**, 1648-9 (2004).

22. Valente, M., Valente, K.D., Sugayama, S.S. & Kim, C.A. Malformation of cortical and vascular development in one family with parietal foramina determined by an ALX4 homeobox gene mutation. *AJNR Am J Neuroradiol* **25**, 1836-9 (2004).
23. Millen, K.J., Grinberg, I., Blank, M. & Dobyns, W.B. ZIC1, ZIC4 and Dandy-Walker malformation. in *Inborn Errors of Development* (eds. Epstein, C.J., Erickson, R.P. & Wynshaw-Boris, A.) (Oxford University Press, Oxford, 2008).
24. Martinet, D. et al. Subtelomeric 6p deletion: clinical and array-CGH characterization in two patients. *Am J Med Genet A* **146A**, 2094-102 (2008).
25. Ballarati, L. et al. 13q Deletion and central nervous system anomalies: further insights from karyotype-phenotype analyses of 14 patients. *J Med Genet* **44**, e60 (2007).
26. Mittrucker, H.W. et al. Requirement for the transcription factor LSIRF/IRF4 for mature B and T lymphocyte function. *Science* **275**, 540-3 (1997).
27. Hong, H.K. et al. The winged helix/forkhead transcription factor Foxq1 regulates differentiation of hair in satin mice. *Genesis* **29**, 163-71 (2001).
28. Wang, T. et al. Forkhead transcription factor Foxf2 (LUN)-deficient mice exhibit abnormal development of secondary palate. *Dev Biol* **259**, 83-94 (2003).
29. Kume, T. et al. The forkhead/winged helix gene Mf1 is disrupted in the pleiotropic mouse mutation congenital hydrocephalus. *Cell* **93**, 985-96 (1998).
